# Supplementary material
Source: PubMed Central journal article supplement (PMC6060666)
Supplement: TX-005-C6TX00101G-s001.pdf [file TX-005-C6TX00101G-s001.pdf]

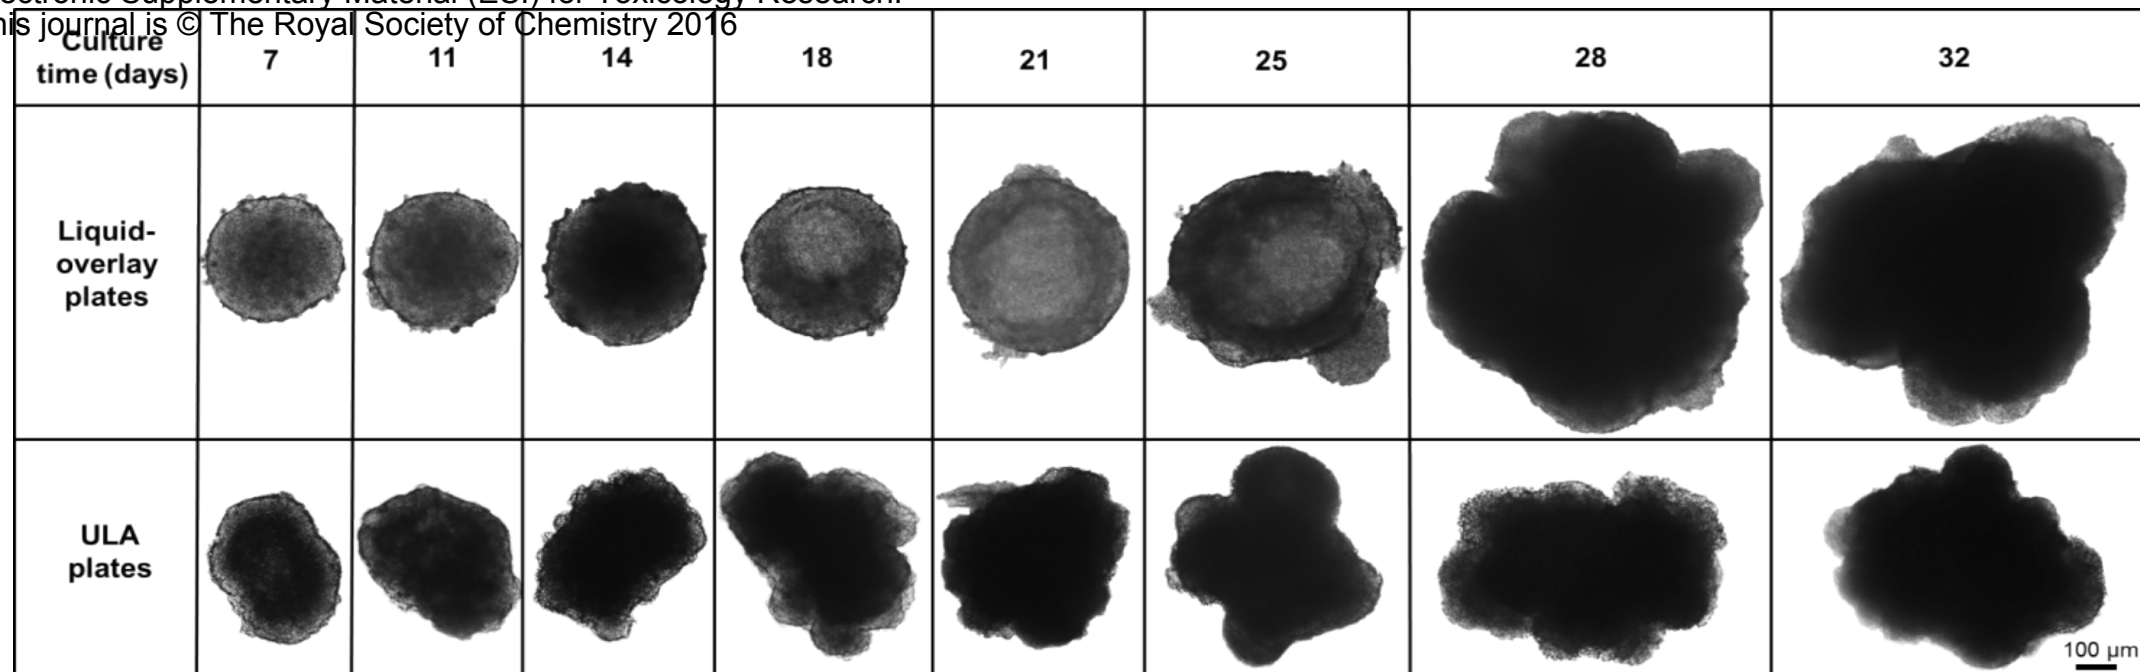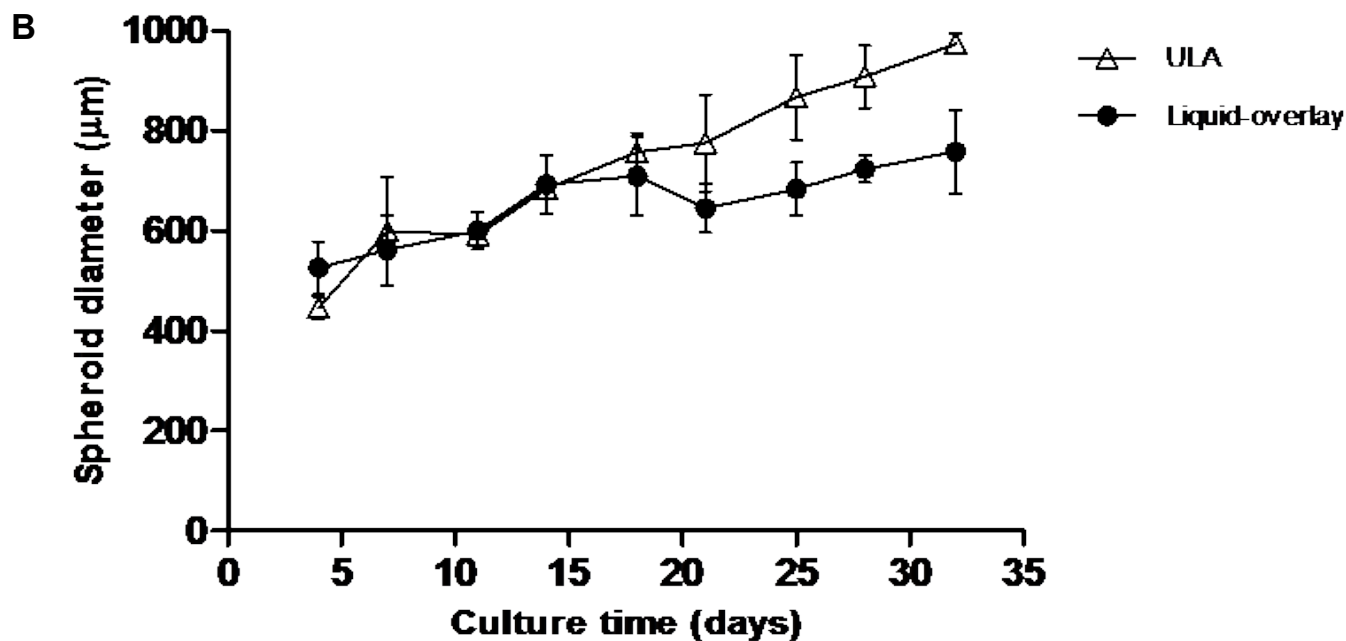

**Supplementary Figure 1. Comparison of spheroid formation techniques.** (A) Phase-contrast images of spheroids cultured from 2500 cells on liquid-overlay or ULA plates over 32 days. Scale bar = 100  $\mu\text{m}$ . (B) Growth curve of spheroids cultured by liquid-overlay technique (black circle) or ULA plates (clear triangle). Spheroid diameter ( $\mu\text{m}$ ) was plotted against culture time (days). Data are represented as mean  $\pm$  standard error ( $n=3$  in triplicate).

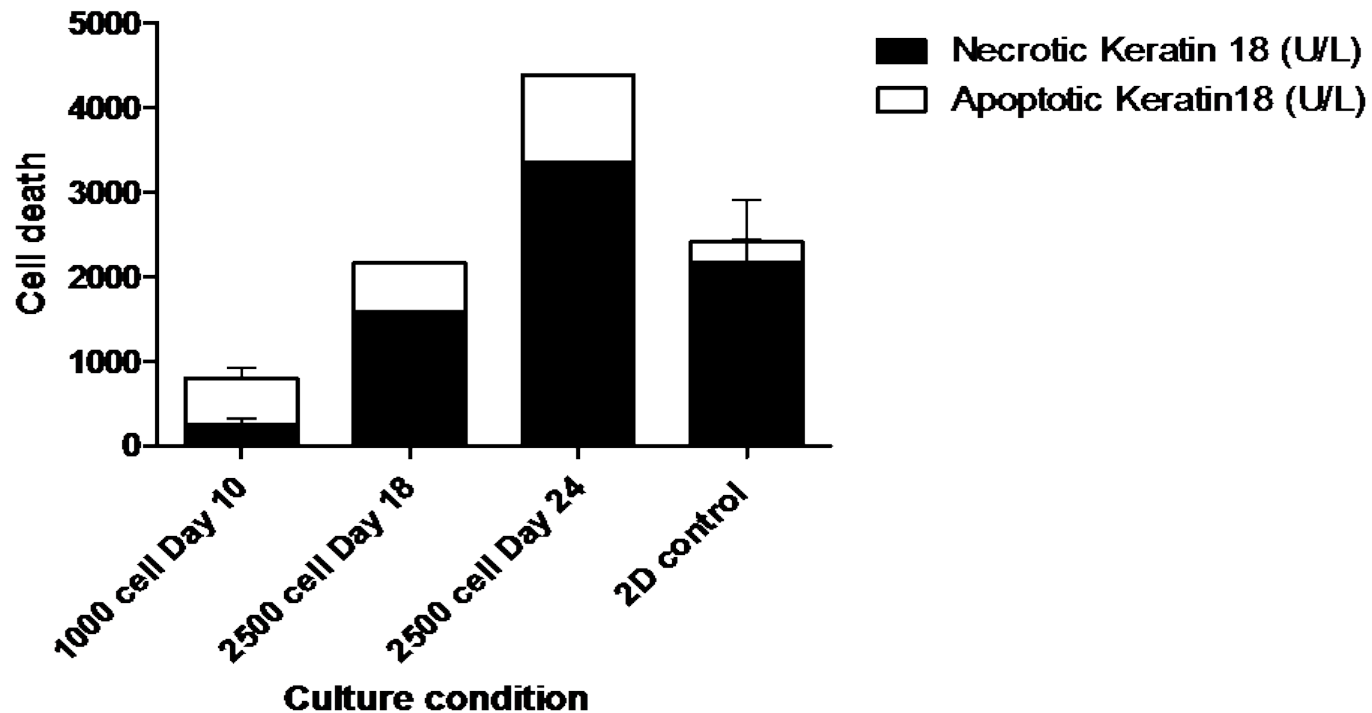

**Supplementary Figure 2. Comparison of basal cell death in spheroids of different sizes.** Biomarkers of apoptosis (cleaved keratin 18) and total cell death (full-length keratin 18) were analysed in supernatants of spheroids of different sizes and culture times, and compared to a 2D monolayer control. Total cell death, split into apoptotic (white) and necrotic (black) are plotted against culture condition. Data are represented as mean  $\pm$  standard error (n=3 using 20 replicates).

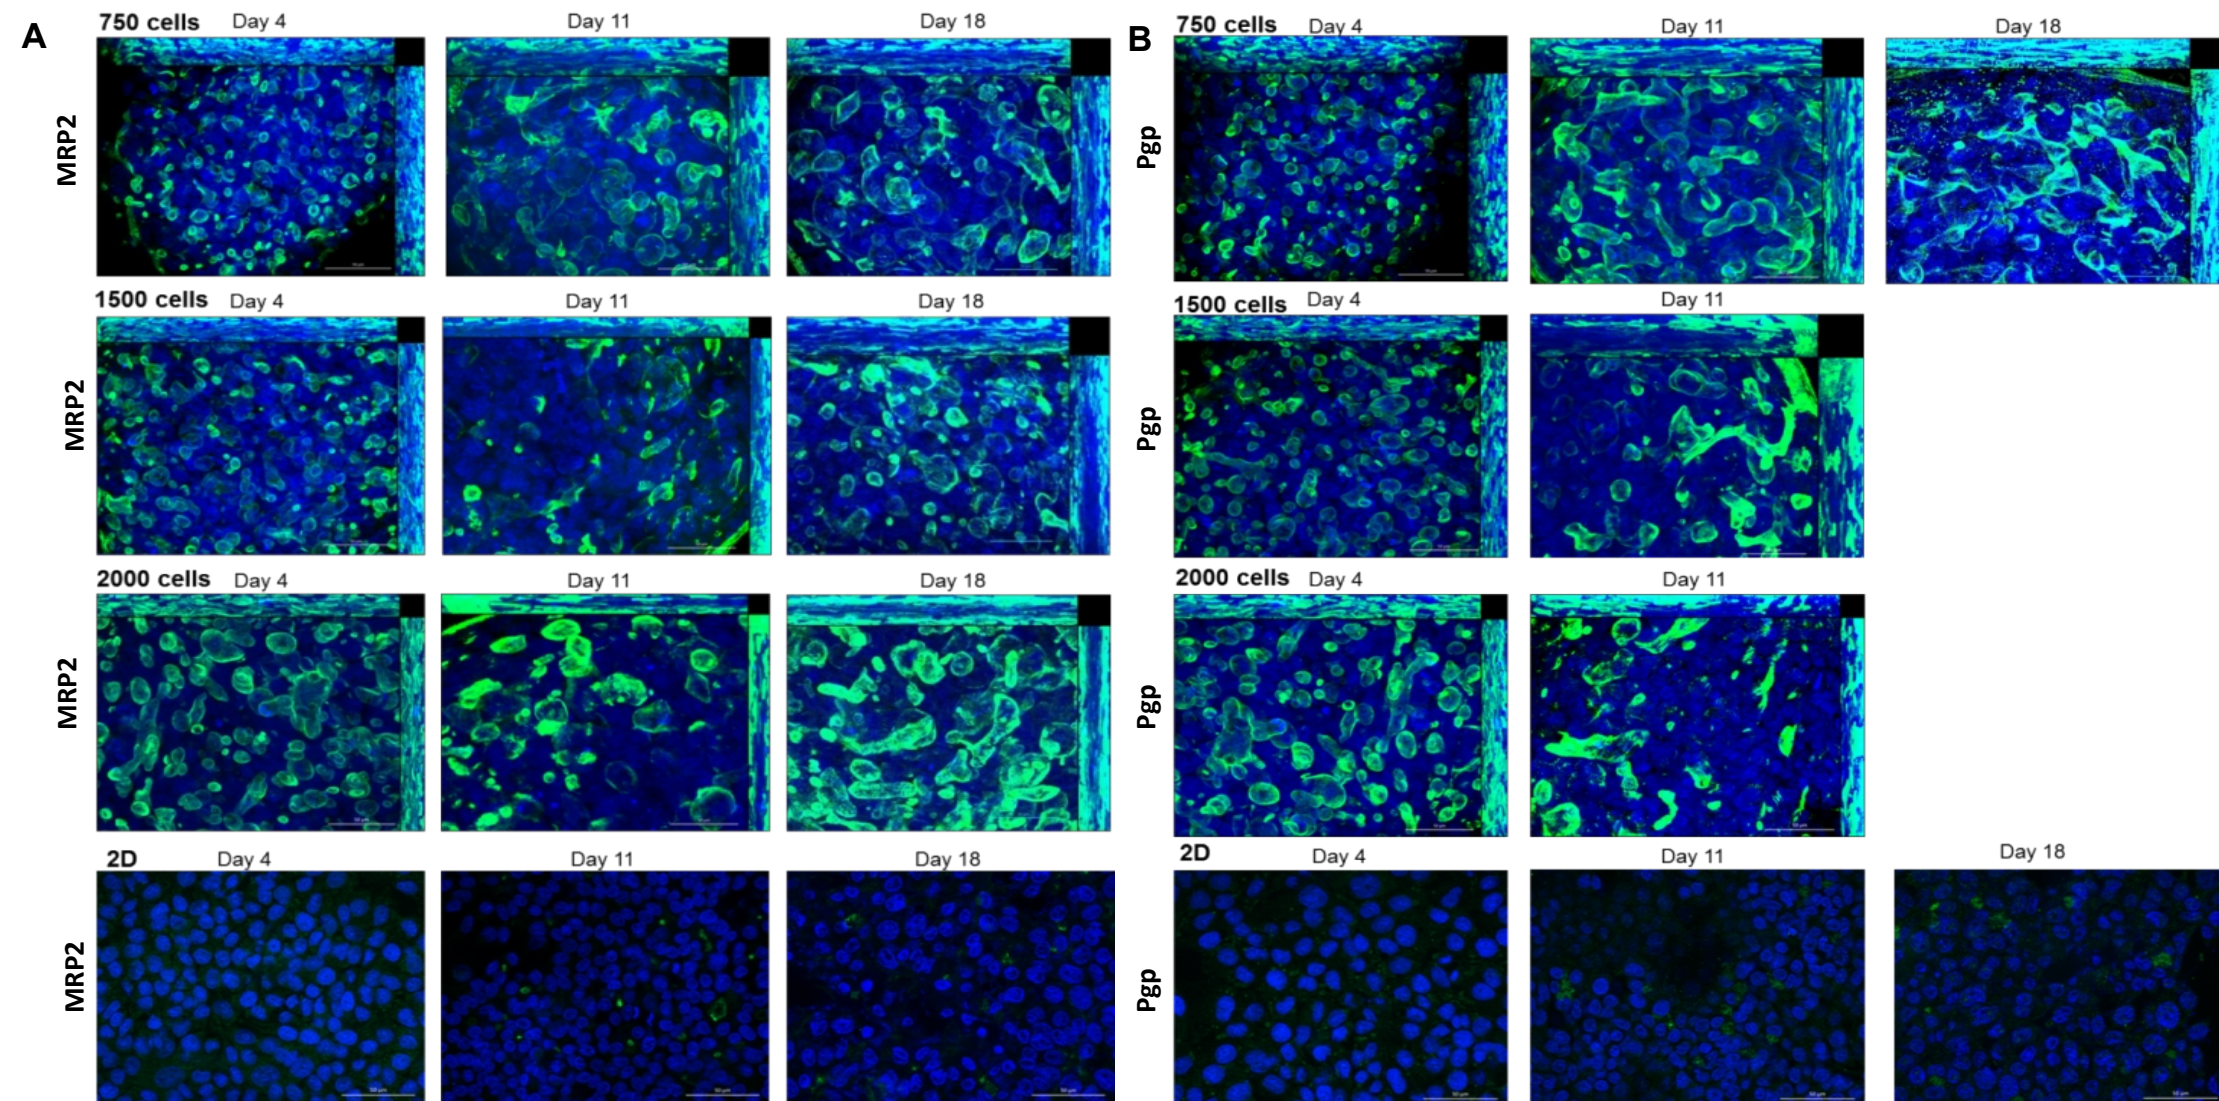

**Supplementary Figure 3. Transporter polarisation in spheroids of different sizes.** Spheroids were created from 750, 1500 or 2000 C3A cells by liquid-overlay technique and compared to C3A cells cultured in a 2D monolayer. Samples were fixed at day 4, 11 and 18 of culture. Immunofluorescent staining was performed for the canalicular transporter (A) MRP2 (green) or; (B) Pgp (green) and Hoechst (blue) to view the nuclei. Maximum intensity projection images were taken using a Zeiss Axio Observer microscope. Scale bars = 50  $\mu$ m.

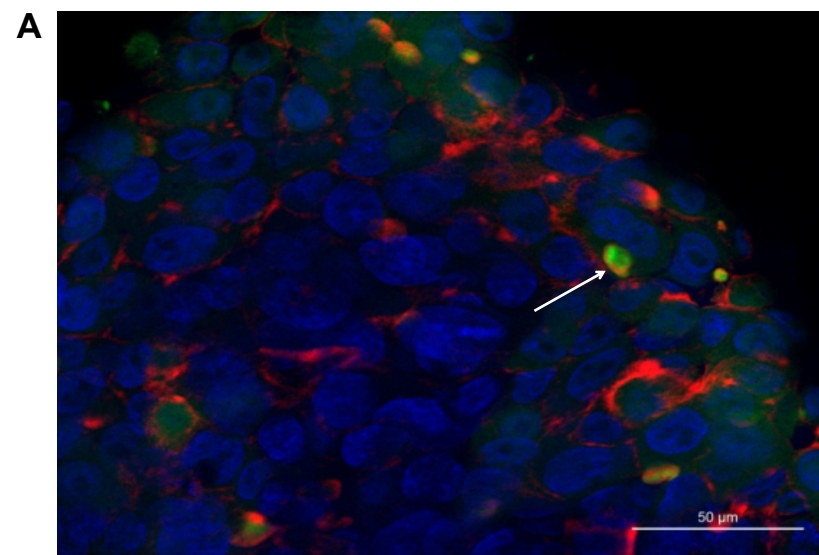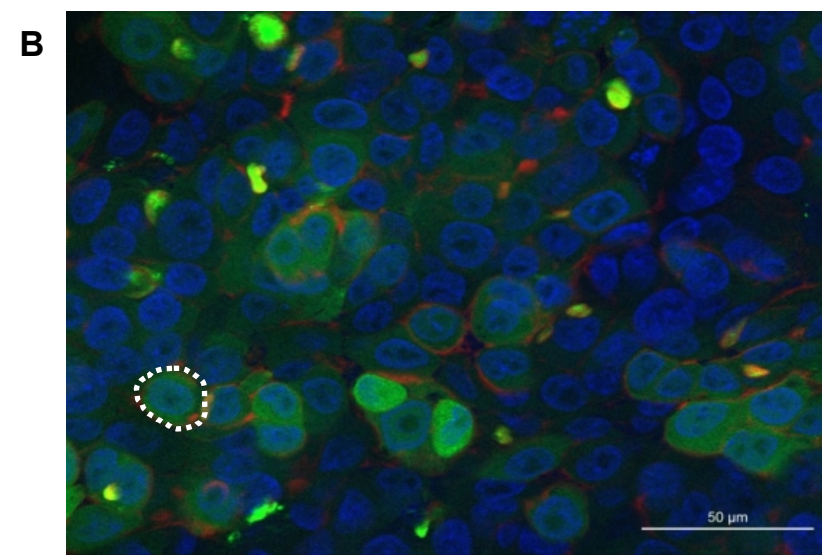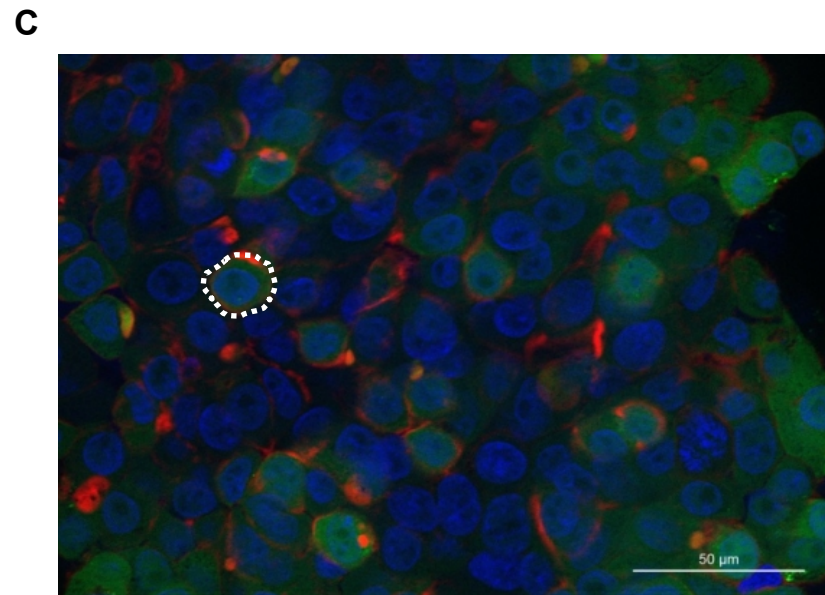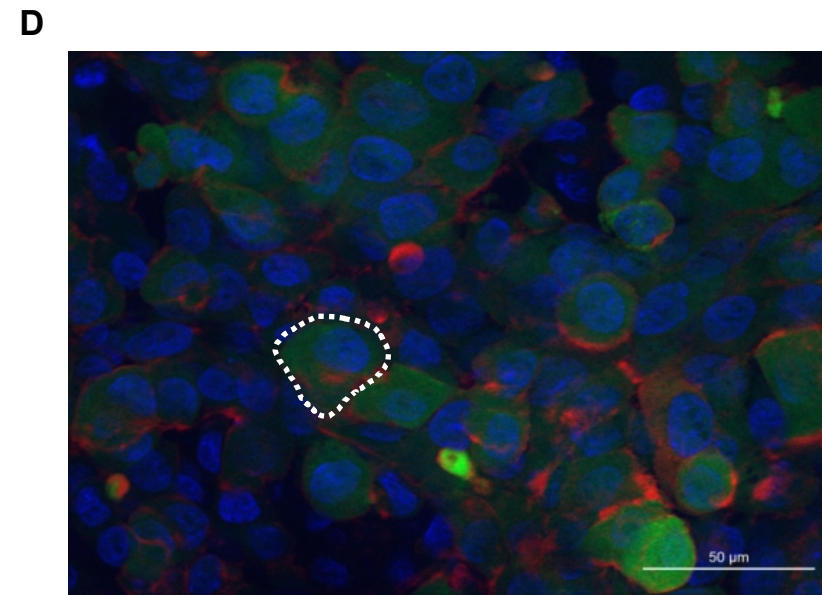

**Supplementary Figure 4. Transporter function in spheroids.** Spheroids were created from 1000 C3A cells on liquid-overlay plates and then incubated with (A) CMFDA (green) only; (B) CMFDA and MK571 (MRP inhibitor); (C) CMFDA and PSC833 (Pgp inhibitor); (D) CMFDA, MK571 and PSC833 for 30 min. Spheroids were washed, fixed and stained with Hoechst (blue) to view the nuclei and phalloidin (red) to view F-actin. Images were taken using a Zeiss Axio Observer microscope. Dotted line indicates an example of a cell where CMFDA is retained within the cell cytoplasm. Arrow indicates the canalicular-like structures containing CMFDA. Scale bars = 50  $\mu$ m.

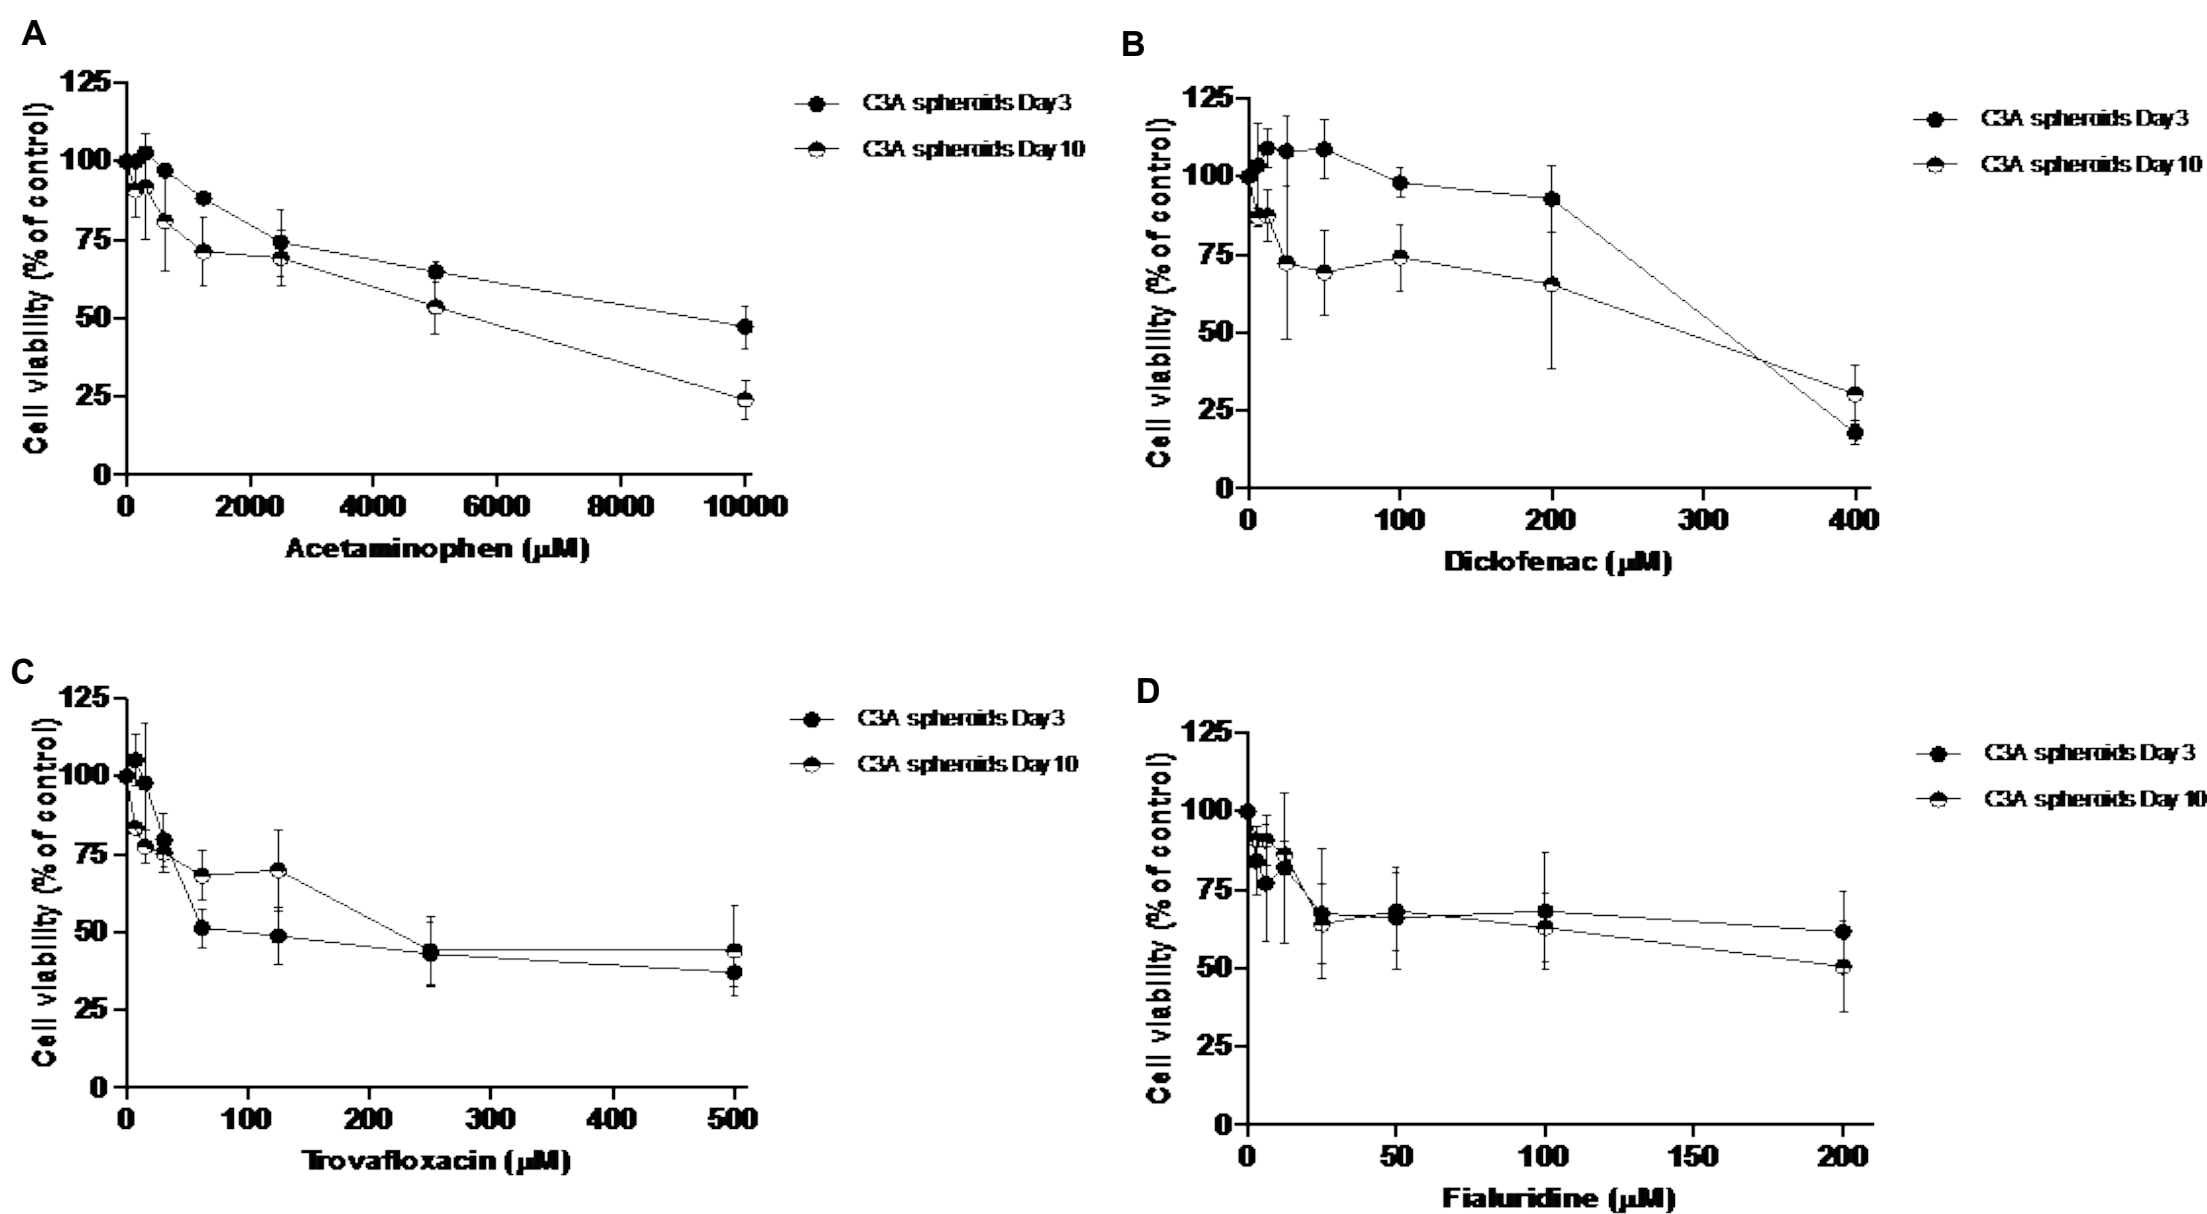

**Supplementary Figure 5. Spheroids show a toxic response to hepatotoxins, regardless of culture time.** Spheroids were created from 1000 C3A cells by liquid-overlay technique and cultured for 3 days or 10 days, and treated with (A) acetaminophen; (B) diclofenac; (C) trovafloxacin and (D) fialuridine. Cell viability was analysed and plotted as a percentage of untreated control. Data are represented as mean  $\pm$  standard error ( $n=3$  in triplicate).
